# Supplementary material for: Inhibition of Nutlin-Resistant HDM2 Mutants by Stapled Peptides
Source: PubMed Central journal article supplement (PMC3835680; doi:10.1371/journal.pone.0081068), 2013-11-20

Figure S1

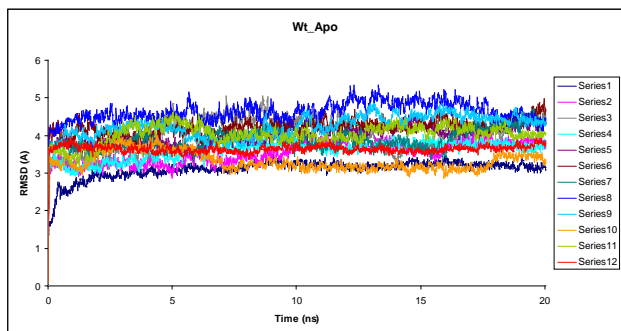

(a)

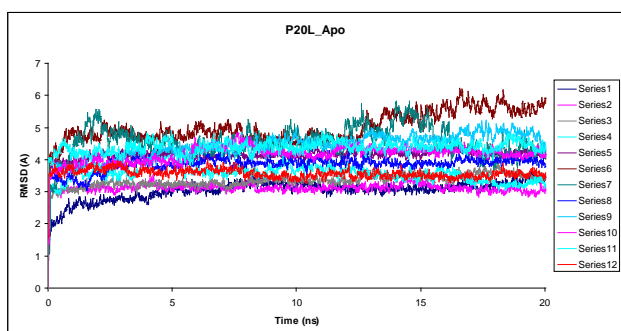

(b)

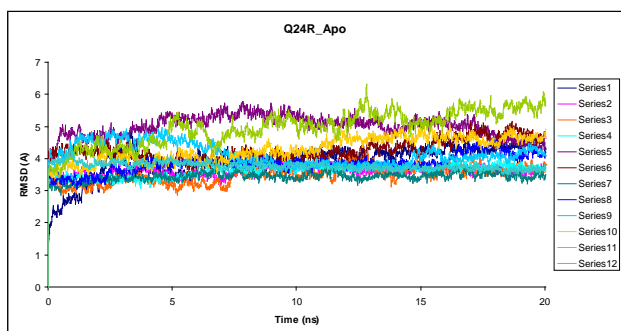

(c)

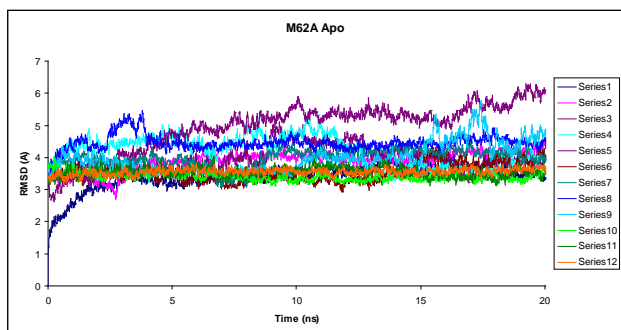

(d)

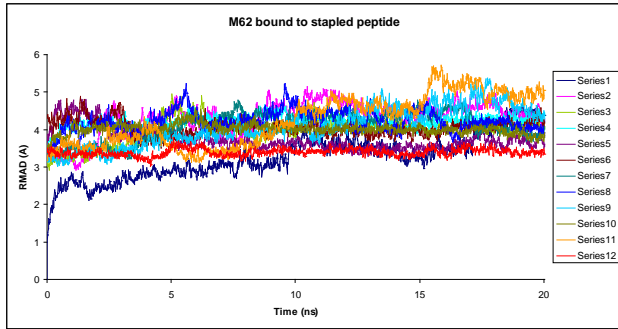

(e)

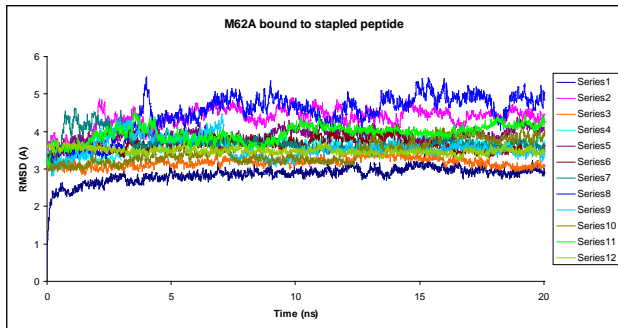

(f)

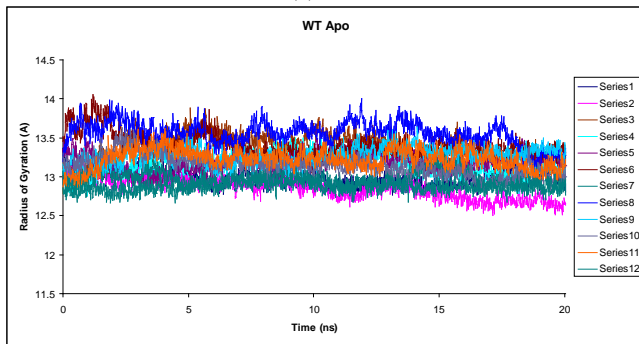

(g)

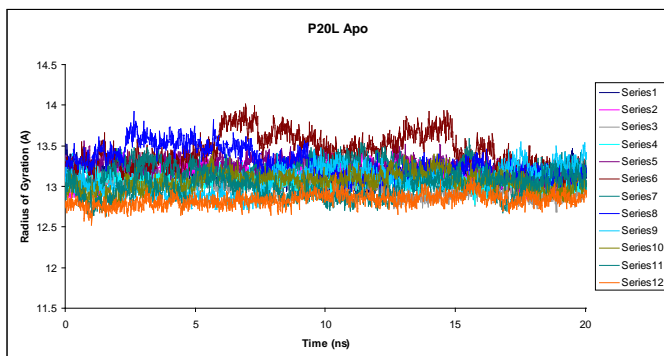

(h)

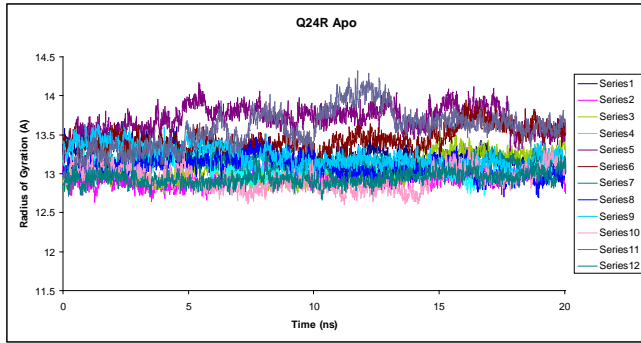

(i)

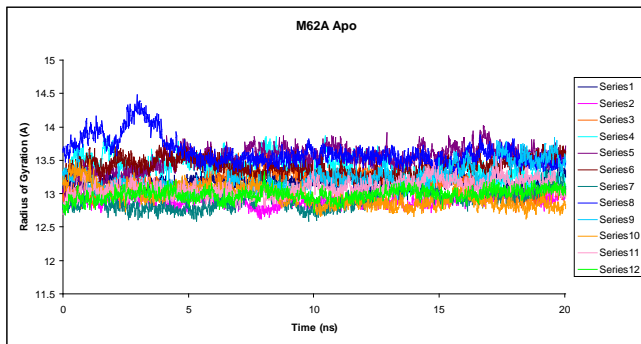

(j)

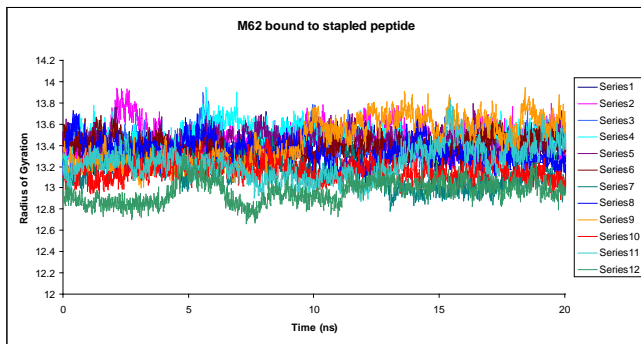

(k)

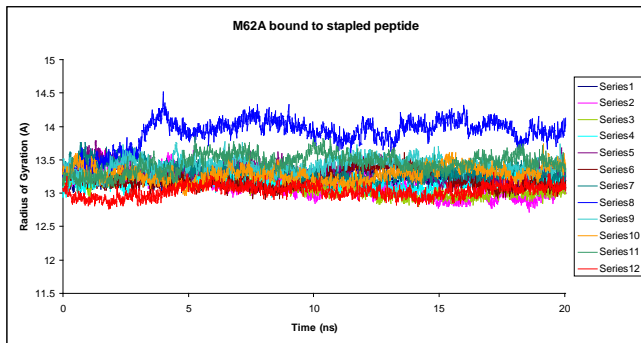

(l)

Figure S2

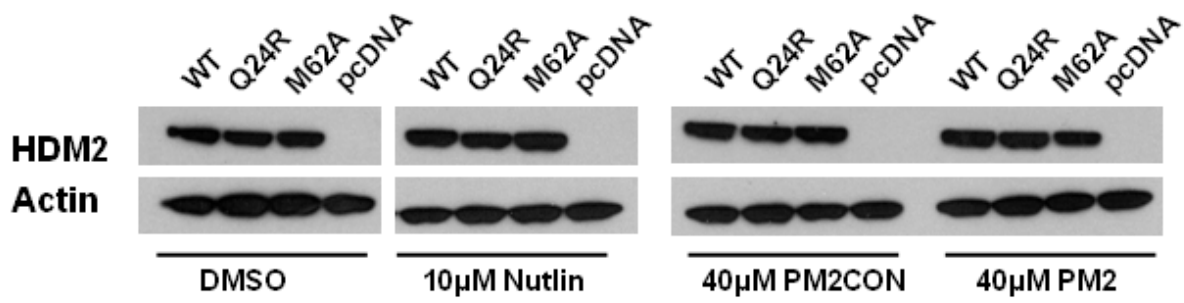

Figure S3a

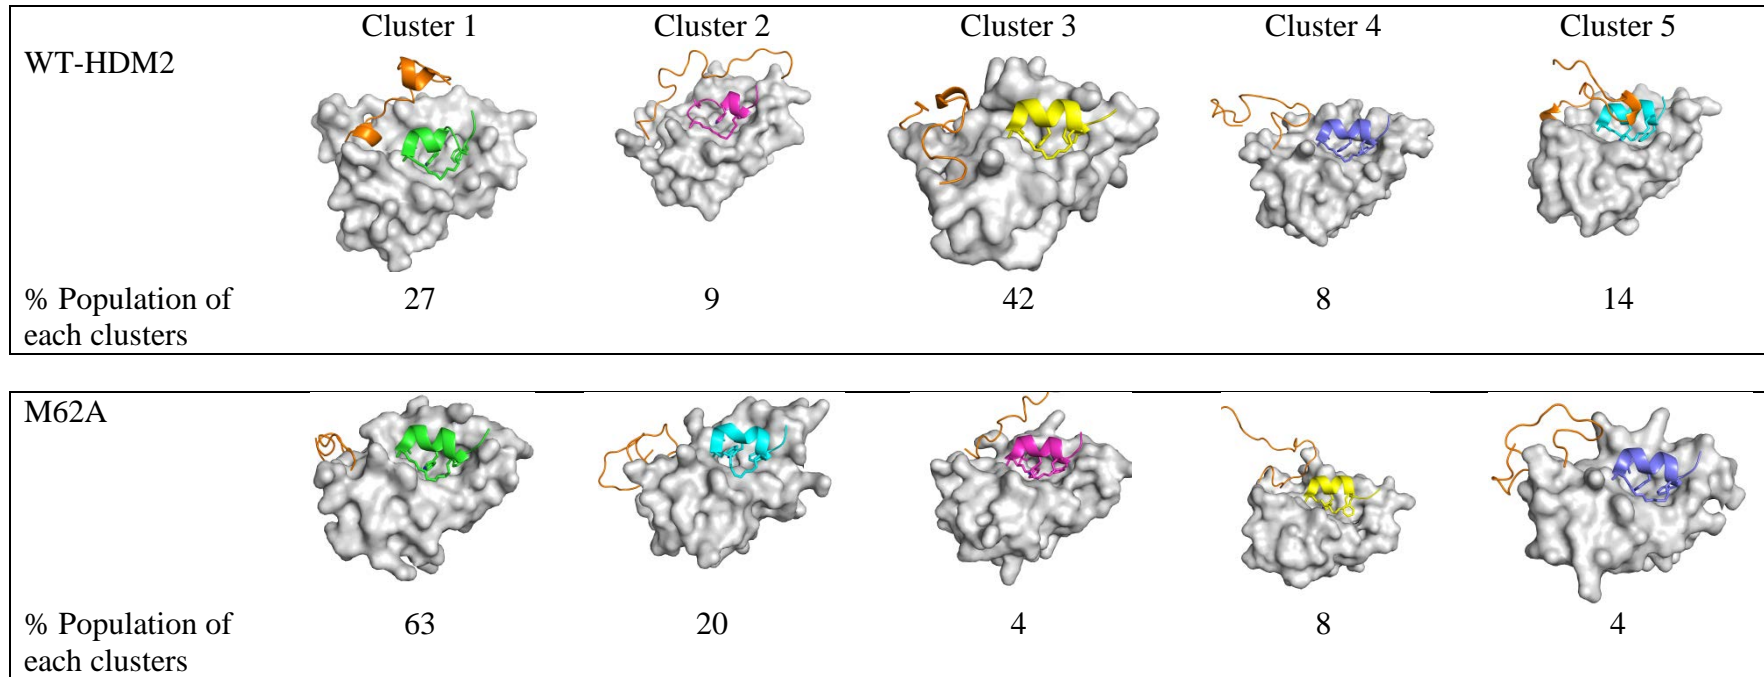

Figure S3b

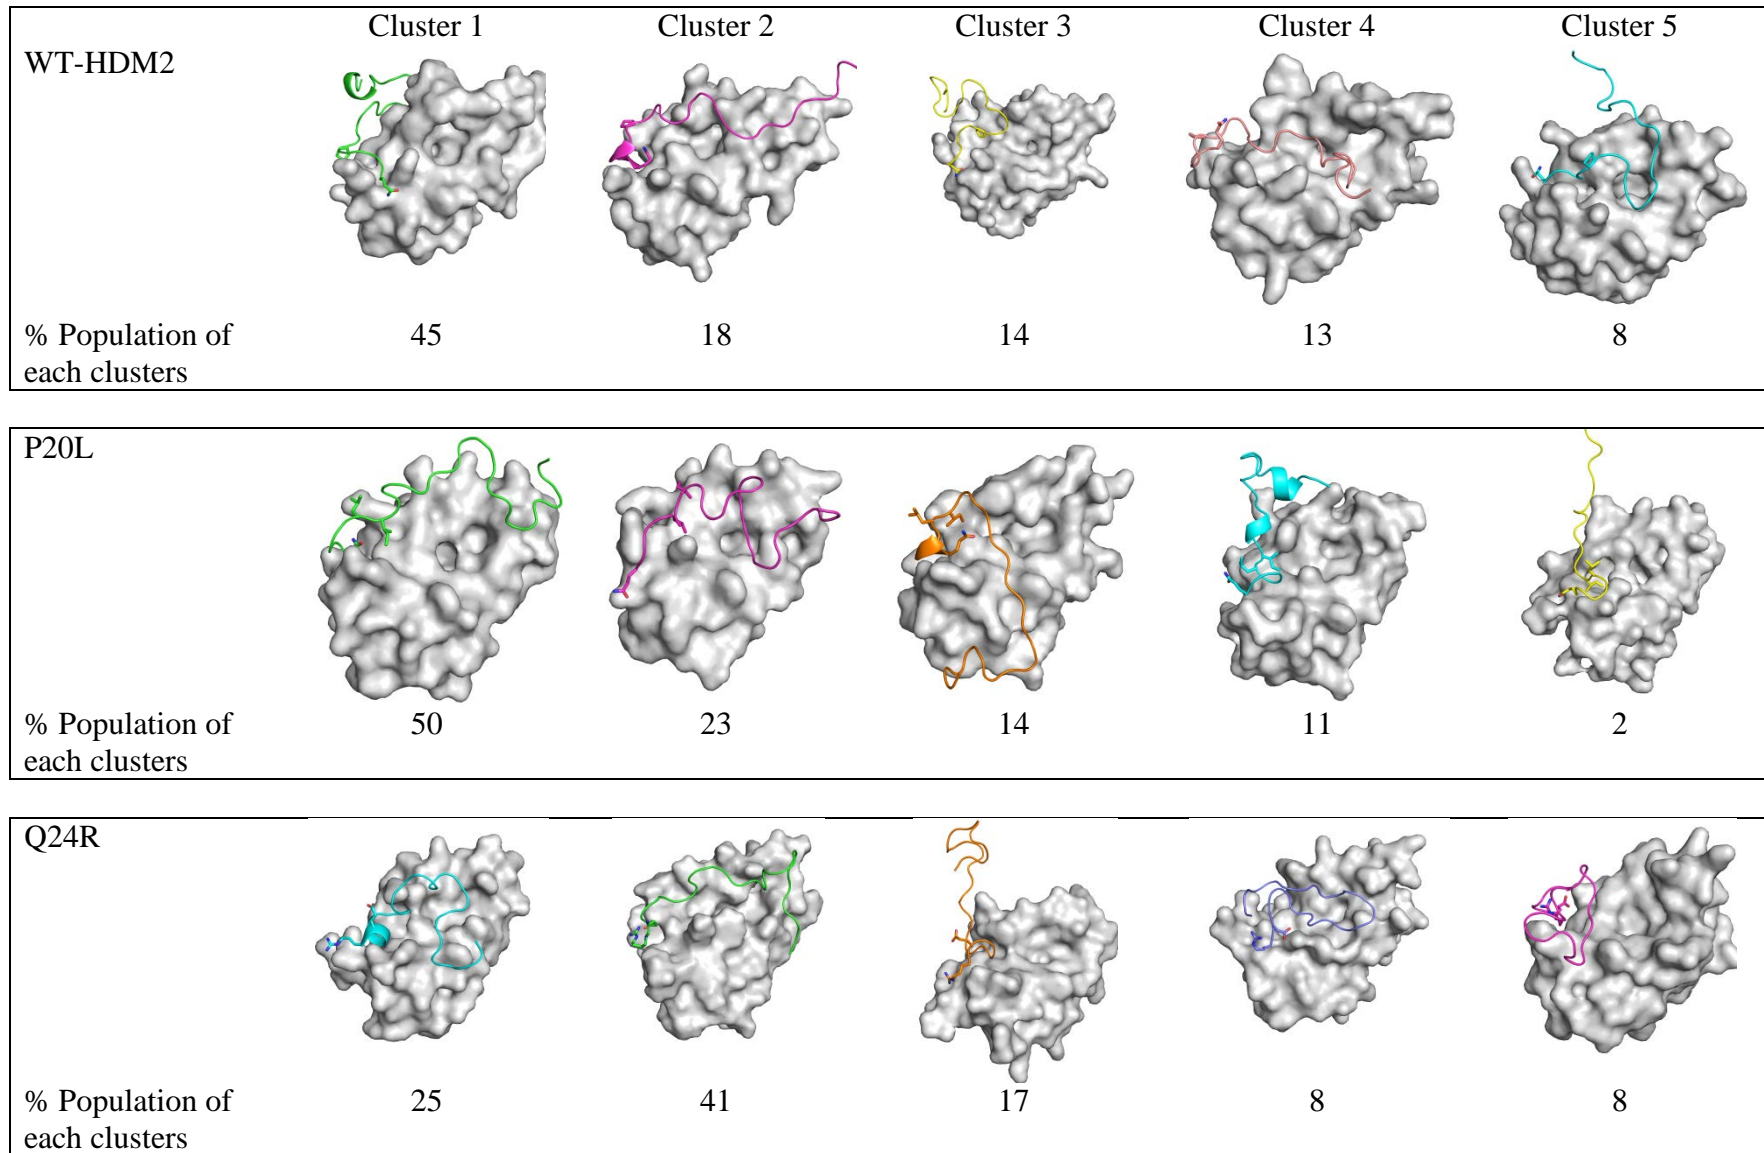

Figure S4a

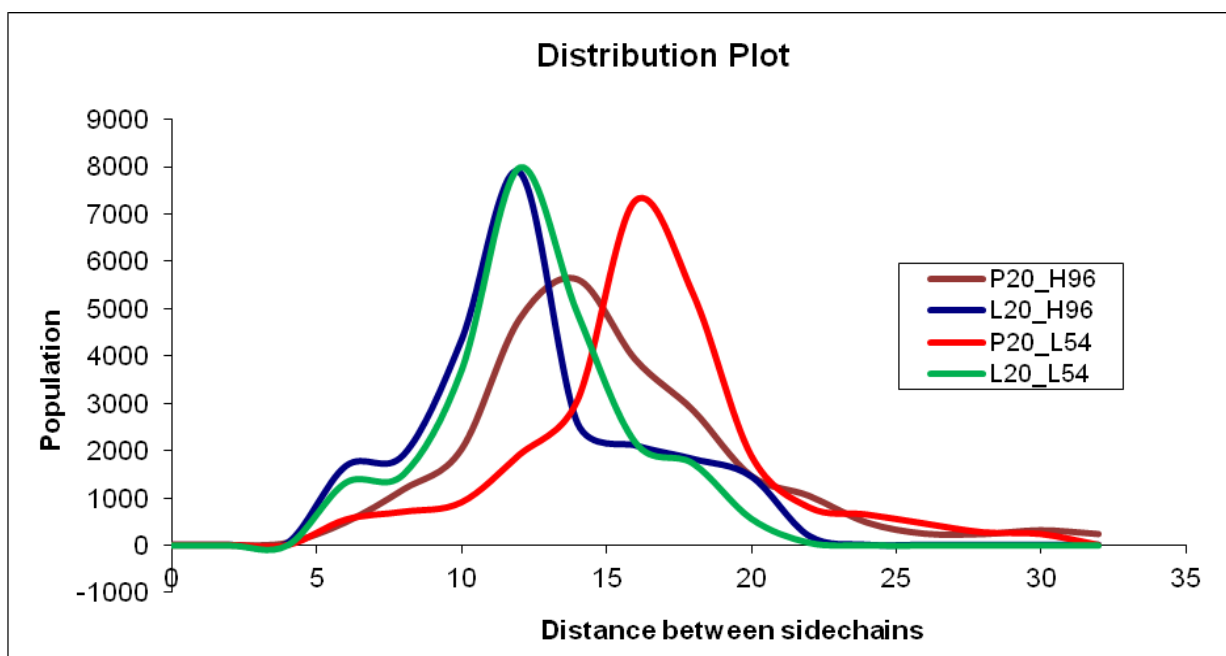

Figure S4b

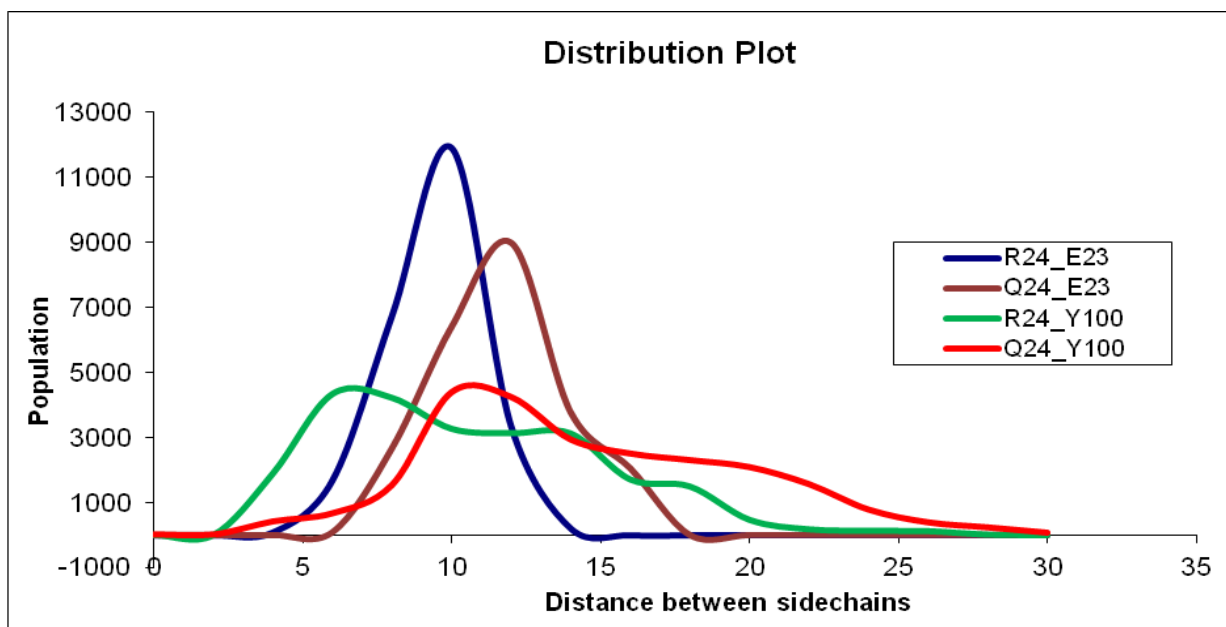

Figure S5

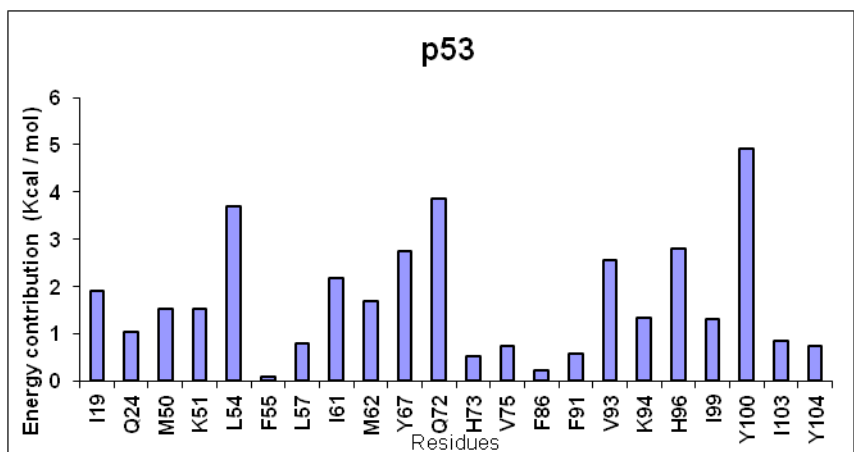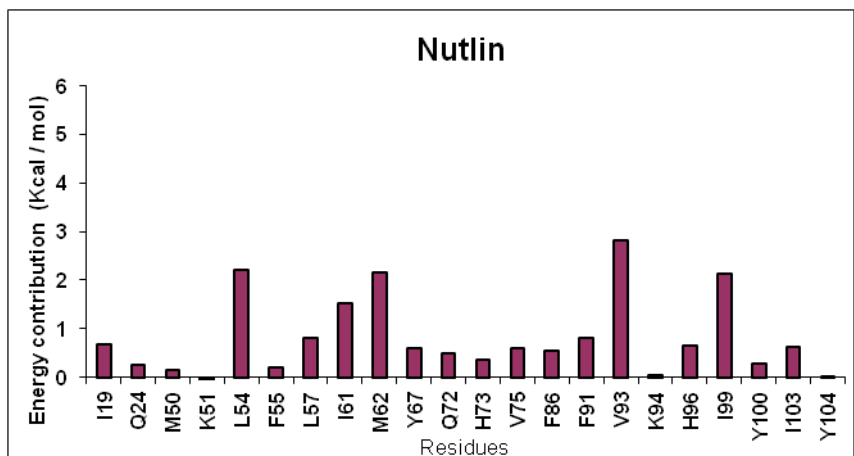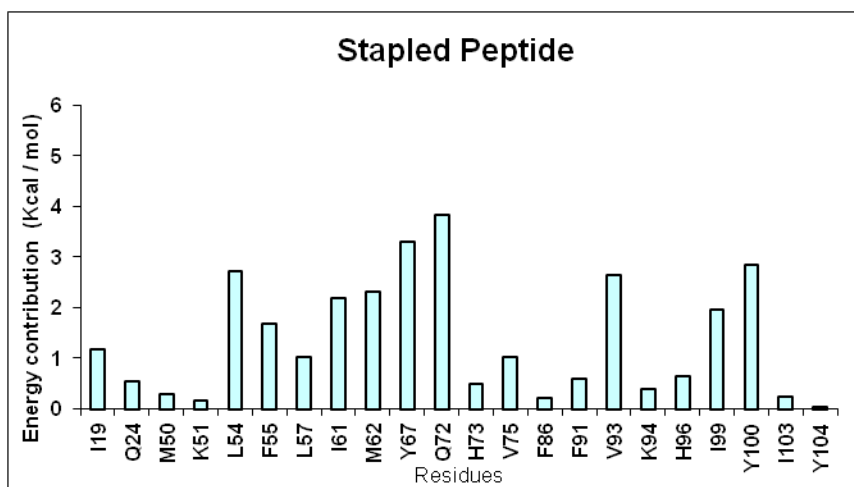

Supplement: pone.0081068.s001.pdf [file pone.0081068.s001.pdf]
